# Supplementary material for: Assessment of Six Blackberry Cultivars Using a Combination of Metabolomics, Biological Activity, and Network Pharmacology Approaches
Source: MDPI journal article supplement (doi:10.3390/antiox13030319), 2024-03-06
Supplement: s1 [file s1]

Supplementary Materials

## Assessment of six blackberry cultivars using a combination of metabolomics, biological activity, and network pharmacology approaches

Hana Lee <sup>1</sup>, Zhixin Wang <sup>1</sup>, Zhanao Deng <sup>2</sup> and Yu Wang <sup>1,\*</sup>

<sup>1</sup> Department of Food Science and Human Nutrition, Citrus Research and Education Center, University of Florida, Lake Alfred, Florida, 33850, USA; lee.hana@ufl.edu, zhixin.wang@ufl.edu

<sup>2</sup> Department of Environmental Horticulture, Gulf Coast Research and Education Center, University of Florida, IFAS, Wimauma, Florida, 33598, USA; zdeng@ufl.edu

\* Correspondence: yu.wang@ufl.edu; Tel.: +1-863-956-8673

13 Table S1. The information of all annotated metabolites in six blackberry cultivars.

| Name                                                          | Formula      | Observed mass | Calculated mass | Mass error (ppm) |
|---------------------------------------------------------------|--------------|---------------|-----------------|------------------|
| (+)-Camphor                                                   | C10 H16 O    | 152.12012     | 152.11983       | -1.89            |
| (2S,3S)-2-Hydroxytridecane-1,2,3-tricarboxylic acid           | C16 H28 O7   | 332.1835      | 332.18335       | -0.45            |
| (R)-(Homo)2-citrate                                           | C8 H12 O7    | 220.0583      | 220.05803       | -1.22            |
| (R)-2-Hydroxyglutarate                                        | C5 H8 O5     | 148.03717     | 148.03705       | -0.81            |
| (S)-1-Piperidine-6-carboxylic acid                            | C6 H9 N O2   | 127.06333     | 127.06302       | -2.39            |
| (S)-2-(Hydroxymethyl)glutarate                                | C6 H10 O5    | 162.05282     | 162.05272       | -0.65            |
| (S)-2-Hydroxyglutarate                                        | C5 H8 O5     | 148.03717     | 148.03702       | -1.01            |
| 1,2,3-Trihydroxybenzene                                       | C6 H6 O3     | 126.03169     | 126.03138       | -2.52            |
| 1,2-Benzoquinone                                              | C6 H4 O2     | 108.02113     | 108.02094       | -1.71            |
| 1-Galloyl-beta-glucose                                        | C13 H16 O10  | 332.07435     | 332.07423       | -0.36            |
| 1-O-Vanilloyl-beta-D-glucose                                  | C14 H18 O9   | 330.09508     | 330.09488       | -0.6             |
| 1-Pyrroline-2-carboxylic acid                                 | C5 H7 N O2   | 113.04768     | 113.04744       | -2.1             |
| 2-(4-Ethoxyphenyl)-5,6,7,8-tetramethoxy-4H-1-benzopyran-4-one | C21 H22 O7   | 386.13655     | 386.13556       | -2.56            |
| 2,3-Dihydroxy-3-methylbutanoate                               | C5 H10 O4    | 134.05791     | 134.05781       | -0.73            |
| 2,3-Dihydroxy-p-cumate                                        | C10 H12 O4   | 196.07356     | 196.07308       | -2.44            |
| 2,3-Dimethylmaleate                                           | C6 H8 O4     | 144.04226     | 144.04191       | -2.39            |
| 2,4-Dihydroxyhept-2-enedioate                                 | C7 H10 O6    | 190.04774     | 190.04765       | -0.47            |
| 2-Amino-3,7-dideoxy-D-threo-hept-6-ulosonic acid              | C7 H13 N O5  | 191.07937     | 191.07891       | -2.42            |
| 2-Aminobenzoic acid                                           | C7 H7 N O2   | 137.04768     | 137.04729       | -2.81            |
| 2-Butyloctyl sulfate                                          | C12 H26 O4 S | 266.15518     | 266.15501       | -0.63            |
| 2-Dehydro-3-deoxy-D-fuconate                                  | C6 H10 O5    | 162.05282     | 162.05266       | -1.04            |
| 2-Dehydro-3-deoxy-L-arabinonate                               | C5 H8 O5     | 148.03717     | 148.0371        | -0.53            |
| 2-Formyl-1-indanone                                           | C10 H8 O2    | 160.05243     | 160.05204       | -2.43            |
| 2-Hydroxy-2,4-pentadienoate                                   | C5 H6 O3     | 114.03169     | 114.03143       | -2.3             |
| 2-Hydroxy-3-oxoadipate                                        | C6 H8 O6     | 176.03209     | 176.03187       | -1.24            |
| 2-Hydroxy-5-methylquinone                                     | C7 H6 O3     | 138.03169     | 138.03145       | -1.78            |
| 2-Hydroxyadipate                                              | C6 H10 O5    | 162.05282     | 162.05267       | -0.93            |
| 2-Hydroxyglutaric acid                                        | C5 H8 O5     | 148.03717     | 148.03713       | -0.29            |
| 2-Hydroxymethyl succinate semialdehyde                        | C5 H8 O4     | 132.04226     | 132.0421        | -1.19            |
| 2-Hydroxymethylclavam                                         | C6 H9 N O3   | 143.05824     | 143.05798       | -1.85            |
| 2-Hydroxyphenylpropanoate                                     | C9 H10 O3    | 166.06299     | 166.06258       | -2.51            |
| 2-Maleylacetate                                               | C6 H6 O5     | 158.02152     | 158.02136       | -1.03            |
| 2-O-(alpha-D-Mannosyl)-D-glycerate                            | C9 H16 O9    | 268.07943     | 268.0792        | -0.86            |
| 2-Oxoadipate                                                  | C6 H8 O5     | 160.03717     | 160.03694       | -1.43            |
| 2-Oxopimelate                                                 | C7 H10 O5    | 174.05282     | 174.05258       | -1.38            |
| 2-Oxosuberate                                                 | C8 H12 O5    | 188.06847     | 188.06826       | -1.14            |
| 2-Phenylethanol                                               | C8 H10 O     | 122.07316     | 122.07286       | -2.51            |

|                                             |              |           |           |       |
|---------------------------------------------|--------------|-----------|-----------|-------|
| 2-Propylglutaric acid                       | C8 H14 O4    | 174.08921 | 174.08903 | -1.01 |
| 3,4-Dihydroxystyrene                        | C8 H8 O2     | 136.05243 | 136.05219 | -1.75 |
| 3-Deoxy-lyxo-heptulosaric acid              | C7 H10 O8    | 222.03757 | 222.03738 | -0.83 |
| 3-Methyleneoxindole                         | C9 H7 N O    | 145.05276 | 145.05248 | -1.96 |
| 3-Propylmalate                              | C7 H12 O5    | 176.06847 | 176.06829 | -1.06 |
| 4-Acetamidobutanoic acid                    | C6 H11 N O3  | 145.07389 | 145.07362 | -1.88 |
| 4-Guanidinobutyric acid                     | C5 H11 N3 O2 | 145.08513 | 145.08484 | -1.96 |
| 4-Hydroxy-2-oxoglutaric acid                | C5 H6 O6     | 162.01644 | 162.01631 | -0.76 |
| 4-Hydroxybenzoate-O-glucoside               | C13 H16 O8   | 300.08452 | 300.0842  | -1.04 |
| 4-Hydroxybenzoic acid                       | C7 H6 O3     | 138.03169 | 138.03163 | -0.43 |
| 4-Hydroxymuconic semialdehyde               | C6 H6 O4     | 142.02661 | 142.02651 | -0.69 |
| 4-Hydroxyphenyllactic acid                  | C9 H10 O4    | 182.05791 | 182.05749 | -2.29 |
| 4-Methyl-3-oxoadipate                       | C7 H10 O5    | 174.05282 | 174.05255 | -1.54 |
| 4-Methylene-L-glutamate                     | C6 H9 N O4   | 159.05316 | 159.05296 | -1.22 |
| 4-O-Methyl-D-glucuronic acid                | C7 H12 O7    | 208.0583  | 208.05817 | -0.65 |
| 4-Oxoproline                                | C5 H7 N O3   | 129.04259 | 129.04234 | -1.95 |
| 4-Propylphenol                              | C9 H12 O     | 136.08881 | 136.08851 | -2.22 |
| 5-(2'-Carboxyethyl)-4,6-dihydroxypicolinate | C9 H9 N O6   | 227.04299 | 227.04253 | -1.99 |
| 5-Acetamidovaleric acid                     | C7 H13 N O3  | 159.08954 | 159.08918 | -2.28 |
| 5-Methyl-2-furaldehyde                      | C6 H6 O2     | 110.03678 | 110.0365  | -2.52 |
| 5-Oxo-1,2-campholide                        | C10 H14 O3   | 182.09429 | 182.09386 | -2.4  |
| 5-Oxohexanoic acid                          | C6 H10 O3    | 130.06299 | 130.06302 | 0.2   |
| 6-Acetyl-D-glucose                          | C8 H14 O7    | 222.07395 | 222.07376 | -0.85 |
| 6-Methylsalicylate                          | C8 H8 O3     | 152.04734 | 152.04717 | -1.14 |
| 7,8-Dihydrobiopterin                        | C9 H13 N5 O3 | 239.10184 | 239.10127 | -2.4  |
| 7-Deoxyloganetin                            | C11 H16 O4   | 212.10486 | 212.10426 | -2.82 |
| 7-Methoxycoumarin                           | C10 H8 O3    | 176.04734 | 176.04688 | -2.62 |
| Acanthoside B                               | C28 H36 O13  | 580.21559 | 580.21516 | -0.74 |
| Acetylpyruvate                              | C5 H6 O4     | 130.02661 | 130.02652 | -0.71 |
| alpha-Methylstyrene                         | C9 H10       | 118.07825 | 118.07801 | -2.04 |
| Aromatic aldehyde                           | C7 H6 O      | 106.04186 | 106.04159 | -2.62 |
| Azelaic acid                                | C9 H16 O4    | 188.10486 | 188.10474 | -0.63 |
| Benzaldehyde                                | C7 H6 O      | 106.04186 | 106.04159 | -2.55 |
| Benzofuran                                  | C8 H6 O      | 118.04186 | 118.04162 | -2.08 |
| Benzoylformic acid                          | C8 H6 O3     | 150.03169 | 150.03136 | -2.24 |
| Benzyl 2-methyl-3-oxobutanoate              | C12 H14 O3   | 206.09429 | 206.09373 | -2.73 |
| Benzyl alcohol                              | C7 H8 O      | 108.05751 | 108.0574  | -1.09 |
| beta-Cymaropyranose                         | C7 H14 O4    | 162.08921 | 162.08911 | -0.61 |
| Caffeic acid                                | C9 H8 O4     | 180.04226 | 180.04173 | -2.91 |

|                                       |               |           |           |       |
|---------------------------------------|---------------|-----------|-----------|-------|
| Caffeyl alcohol                       | C9 H10 O3     | 166.06299 | 166.0626  | -2.39 |
| Calystegin B2                         | C7 H13 N O4   | 175.08446 | 175.08409 | -2.1  |
| Carpacin                              | C11 H12 O3    | 192.07864 | 192.07825 | -2.06 |
| Catechol                              | C6 H6 O2      | 110.03678 | 110.03651 | -2.45 |
| Cellobionate                          | C12 H22 O12   | 358.11113 | 358.11101 | -0.33 |
| Cinnamaldehyde                        | C9 H8 O       | 132.05751 | 132.05721 | -2.34 |
| cis-1,2-Dihydronaphthalene-1,2-diol   | C10 H10 O2    | 162.06808 | 162.06772 | -2.23 |
| cis-2,3-Dihydro-2,3-dihydroxybiphenyl | C12 H12 O2    | 188.08373 | 188.08319 | -2.89 |
| cis-Aconitic acid                     | C6 H6 O6      | 174.01644 | 174.01615 | -1.64 |
| cis-Homoaconitate                     | C7 H8 O6      | 188.03209 | 188.0319  | -1.02 |
| Citric acid                           | C6 H8 O7      | 192.027   | 192.02673 | -1.43 |
| Coumarin                              | C9 H6 O2      | 146.03678 | 146.03648 | -2.05 |
| Cyclohexane-1,3-dione                 | C6 H8 O2      | 112.05243 | 112.05211 | -2.86 |
| Cyclohexylamine                       | C6 H13 N      | 99.1048   | 99.10452  | -2.84 |
| Cytosine                              | C4 H5 N3 O    | 111.04326 | 111.04296 | -2.71 |
| Decanedioic acid                      | C10 H18 O4    | 202.12051 | 202.12047 | -0.18 |
| Deidaclin                             | C12 H17 N O6  | 271.10559 | 271.10506 | -1.94 |
| D-Fructose 6-phosphate                | C6 H13 O9 P   | 260.02972 | 260.02942 | -1.15 |
| D-Gluconic acid                       | C6 H12 O7     | 196.0583  | 196.05809 | -1.06 |
| D-Glucose                             | C6 H12 O6     | 180.06339 | 180.0632  | -1.04 |
| D-Glucose 6-phosphate                 | C6 H13 O9 P   | 260.02972 | 260.02939 | -1.25 |
| D-Glycerate                           | C3 H6 O4      | 106.02661 | 106.02647 | -1.31 |
| Difructose anhydride                  | C12 H20 O10   | 324.10565 | 324.105   | -1.98 |
| Digitalose                            | C7 H14 O5     | 178.08412 | 178.08397 | -0.84 |
| Dihydrocaffeic acid                   | C9 H10 O4     | 182.05791 | 182.0578  | -0.57 |
| D-Leucate                             | C6 H12 O3     | 132.07864 | 132.07857 | -0.57 |
| Dodecanedioic acid                    | C12 H22 O4    | 230.15181 | 230.15164 | -0.73 |
| D-Xylolate                            | C5 H10 O6     | 166.04774 | 166.04745 | -1.74 |
| Ethyl cinnamate                       | C11 H12 O2    | 176.08373 | 176.08332 | -2.31 |
| Ferulic acid                          | C10 H10 O4    | 194.05791 | 194.05774 | -0.89 |
| gamma-Aminobutyric acid               | C4 H9 N O2    | 103.06333 | 103.06306 | -2.62 |
| Genipin                               | C11 H14 O5    | 226.08412 | 226.08354 | -2.58 |
| Glucovanillin                         | C14 H18 O8    | 314.10017 | 314.10006 | -0.33 |
| Glucuronic acid                       | C6 H10 O7     | 194.04265 | 194.04238 | -1.4  |
| Glucuronolactone                      | C6 H8 O6      | 176.03209 | 176.03168 | -2.3  |
| Glutamyl-glutamic acid                | C10 H16 N2 O7 | 276.09575 | 276.09571 | -0.15 |
| Glutarate                             | C5 H8 O4      | 132.04226 | 132.04211 | -1.14 |
| Glycyl-leucine                        | C8 H16 N2 O3  | 188.11609 | 188.1157  | -2.1  |
| Homogentisic acid                     | C8 H8 O4      | 168.04226 | 168.04179 | -2.77 |

|                                     |                 |           |           |       |
|-------------------------------------|-----------------|-----------|-----------|-------|
| Indan-1-ol                          | C9 H10 O        | 134.07316 | 134.0728  | -2.69 |
| Isoferulic acid                     | C10 H10 O4      | 194.05791 | 194.05771 | -1.03 |
| Jasmone                             | C11 H16 O       | 164.12012 | 164.11979 | -2    |
| Ketodeoxyoctonate                   | C8 H14 O8       | 238.06887 | 238.06871 | -0.67 |
| L-2-Aminoadipate                    | C6 H11 N O4     | 161.06881 | 161.06844 | -2.25 |
| Lariciresinol                       | C20 H24 O6      | 360.15729 | 360.15634 | -2.63 |
| L-Ascorbic acid-2-glucoside         | C12 H18 O11     | 338.08491 | 338.08484 | -0.2  |
| Lentiginosine                       | C8 H15 N O2     | 157.11028 | 157.10996 | -2.05 |
| L-Formylkynurenine                  | C11 H12 N2 O4   | 236.07971 | 236.07932 | -1.66 |
| L-Glutamate                         | C5 H9 N O4      | 147.05316 | 147.05301 | -1.04 |
| L-Glutamate 5-semialdehyde          | C5 H9 N O3      | 131.05824 | 131.0581  | -1.08 |
| Limonene                            | C10 H16         | 136.1252  | 136.12497 | -1.69 |
| L-Pipecolate                        | C6 H11 N O2     | 129.07898 | 129.07875 | -1.78 |
| L-Serine                            | C3 H7 N O3      | 105.04259 | 105.04235 | -2.35 |
| L-Tyrosine                          | C9 H11 N O3     | 181.07389 | 181.07342 | -2.64 |
| L-Tyrosine methyl ester             | C10 H13 N O3    | 195.08954 | 195.08914 | -2.06 |
| Luteolin                            | C15 H10 O6      | 286.04774 | 286.04691 | -2.88 |
| L-Valine                            | C5 H11 N O2     | 117.07898 | 117.07871 | -2.33 |
| Malic acid                          | C4 H6 O5        | 134.02152 | 134.02143 | -0.72 |
| Melibiitol                          | C12 H24 O11     | 344.13186 | 344.13161 | -0.73 |
| Methyl beta-D-galactoside           | C7 H14 O6       | 194.07904 | 194.07878 | -1.34 |
| Mevalonic acid                      | C6 H12 O4       | 148.07356 | 148.07346 | -0.64 |
| N-(3-Oxohexanoyl)homoserine lactone | C10 H15 N O4    | 213.10011 | 213.09964 | -2.21 |
| N,N-Dihydroxy-L-valine              | C5 H11 N O4     | 149.06881 | 149.06851 | -2.01 |
| N2-Acetyl-L-aminoadipate            | C8 H13 N O5     | 203.07937 | 203.07928 | -0.45 |
| N-Acetyl-beta-D-glucosaminylamine   | C8 H16 N2 O5    | 220.10592 | 220.10552 | -1.84 |
| N-Acetyl-D-glucosamine              | C8 H15 N O7     | 237.08485 | 237.08471 | -0.59 |
| N-Acetyl-L-2-amino-6-oxopimelate    | C9 H13 N O6     | 231.07429 | 231.07405 | -1.01 |
| N-Acetyl-L-phenylalanine            | C11 H13 N O3    | 207.08954 | 207.08927 | -1.31 |
| N-Acetylorlithine                   | C7 H14 N2 O3    | 174.10044 | 174.10006 | -2.21 |
| N-Butyryl-L-homoserine lactone      | C8 H13 N O3     | 171.08954 | 171.08915 | -2.28 |
| N-Ethylmaleimide                    | C6 H7 N O2      | 125.04768 | 125.04742 | -2.04 |
| N-Hydroxy-L-valine                  | C5 H11 N O3     | 133.07389 | 133.07361 | -2.09 |
| Nicotianamine                       | C12 H21 N3 O6   | 303.14304 | 303.14256 | -1.56 |
| Nicotinamide                        | C6 H6 N2 O      | 122.04801 | 122.04776 | -2.05 |
| Nicotinic acid                      | C6 H5 N O2      | 123.03203 | 123.0318  | -1.86 |
| Octylamine                          | C8 H19 N        | 129.15175 | 129.15156 | -1.44 |
| Oxoglutaric acid                    | C7 H8 O7        | 204.027   | 204.02687 | -0.64 |
| Pantetheine                         | C11 H22 N2 O4 S | 278.13003 | 278.12974 | -1.04 |

|                          |                     |           |           |       |
|--------------------------|---------------------|-----------|-----------|-------|
| Pantothenate             | C9 H17 N O5         | 219.11067 | 219.11042 | -1.15 |
| p-Coumaraldehyde         | C9 H8 O2            | 148.05243 | 148.05213 | -2.05 |
| p-Coumaric acid          | C9 H8 O3            | 164.04734 | 164.04728 | -0.36 |
| Phenyllactylglucose      | C15 H20 O8          | 328.11582 | 328.11572 | -0.29 |
| Picolinamide             | C6 H6 N2 O          | 122.04801 | 122.04773 | -2.36 |
| Plantagoside             | C21 H22 O12         | 466.11113 | 466.11063 | -1.06 |
| Proclavaminc acid        | C8 H14 N2 O4        | 202.09536 | 202.09489 | -2.32 |
| Prolylleucine            | C11 H20 N2 O3       | 228.14739 | 228.147   | -1.74 |
| Pyridoxine               | C8 H11 N O3         | 169.07389 | 169.07345 | -2.61 |
| Quercitrin               | C21 H20 O11         | 448.10056 | 448.09906 | -3.36 |
| Quinic acid              | C7 H12 O6           | 192.06339 | 192.06326 | -0.65 |
| Secologanate             | C16 H22 O10         | 374.1213  | 374.12119 | -0.27 |
| Sinapyl alcohol          | C11 H14 O4          | 210.08921 | 210.08861 | -2.86 |
| Succinate semialdehyde   | C4 H6 O3            | 102.03169 | 102.03155 | -1.44 |
| Syringin                 | C17 H24 O9          | 372.14203 | 372.14172 | -0.85 |
| Taxifolin                | C15 H12 O7          | 304.0583  | 304.05769 | -2.01 |
| Threonate                | C4 H8 O5            | 136.03717 | 136.03713 | -0.33 |
| trans-Cinnamic acid      | C9 H8 O2            | 148.05243 | 148.05227 | -1.05 |
| Triacetate               | C6 H8 O4            | 144.04226 | 144.04208 | -1.23 |
| Tuberonic acid glucoside | C18 H28 O9          | 388.17333 | 388.17329 | -0.11 |
| Uridine 5'-diphosphate   | C9 H14 N2 O12<br>P2 | 404.0022  | 404.00145 | -1.85 |
| Vanillic acid            | C8 H8 O4            | 168.04226 | 168.04208 | -1.07 |
| Xylitol                  | C5 H12 O5           | 152.06847 | 152.06834 | -0.87 |
| Xylobiose                | C10 H18 O9          | 282.09508 | 282.09488 | -0.73 |

16      Table S2. Optimal scan parameters for targeted compounds

| Compound                              | RT (min) | Polarity | Precursor (m/z) | Product (m/z) | Collision energy (V) | RF lens (V) |
|---------------------------------------|----------|----------|-----------------|---------------|----------------------|-------------|
| Cyanidin-3-glucoside                  | 2.65     | +        | 449.1           | 287.1         | 23                   | 229         |
| Cyanidin-3-rutinoside                 | 2.64     | +        | 595.2           | 287.1         | 30                   | 249         |
| Epicatechin                           | 3.64     | +        | 291.1           | 139.1         | 17                   | 63          |
| Epicatechin gallate                   | 4.70     | +        | 443.1           | 273.1         | 10                   | 163         |
| Epigallocatechin gallate              | 3.66     | +        | 459.1           | 289.1         | 10                   | 192         |
| Genistein- <i>d</i> <sub>4</sub>      | 7.45     | +        | 275.1           | 219.1         | 25                   | 229         |
| Gallic acid                           | 1.70     | −        | 168.8           | 125.1         | 16                   | 175         |
| Vanillic acid                         | 2.20     | −        | 167             | 152           | 15                   | 126         |
| Coumaric acid                         | 2.00     | −        | 163.1           | 119.1         | 16                   | 135         |
| Ferulic acid                          | 1.90     | −        | 193             | 134.1         | 17                   | 143         |
| Sinapic acid                          | 1.91     | −        | 223.1           | 208           | 14                   | 166         |
| Salicylic acid- <i>d</i> <sub>4</sub> | 1.78     | −        | 141             | 97.1          | 19                   | 122         |

17

18

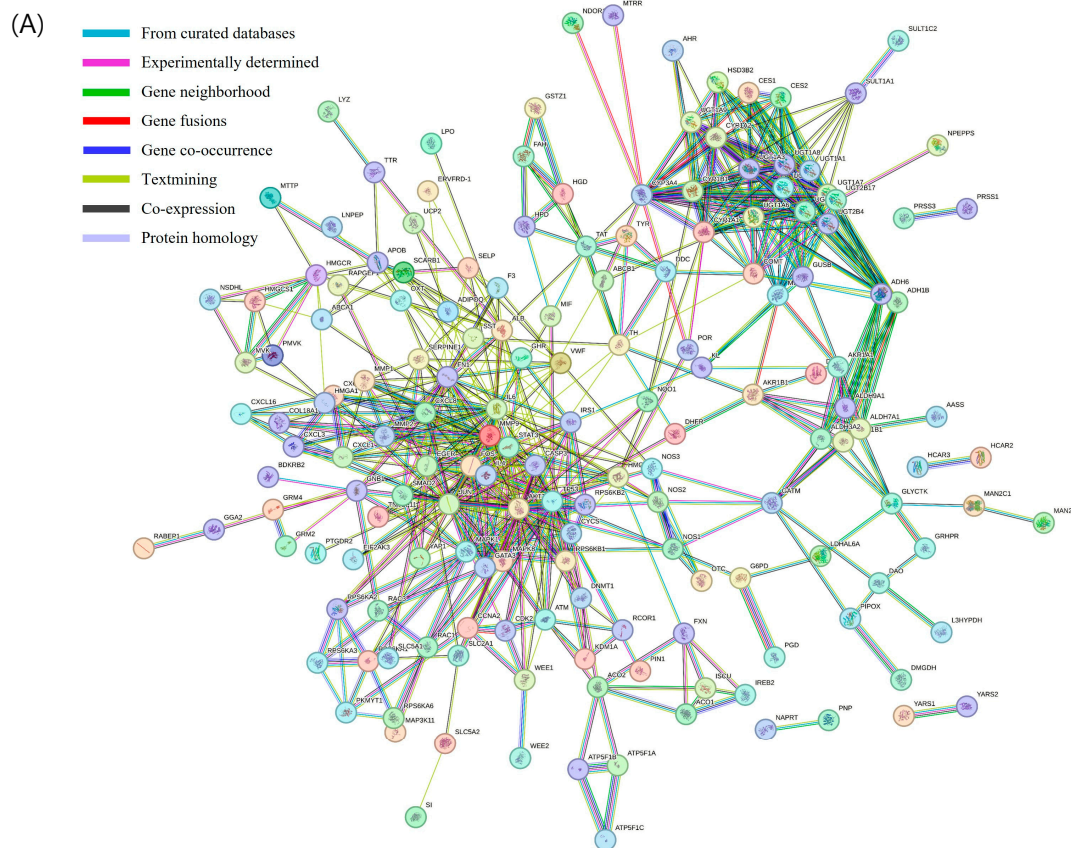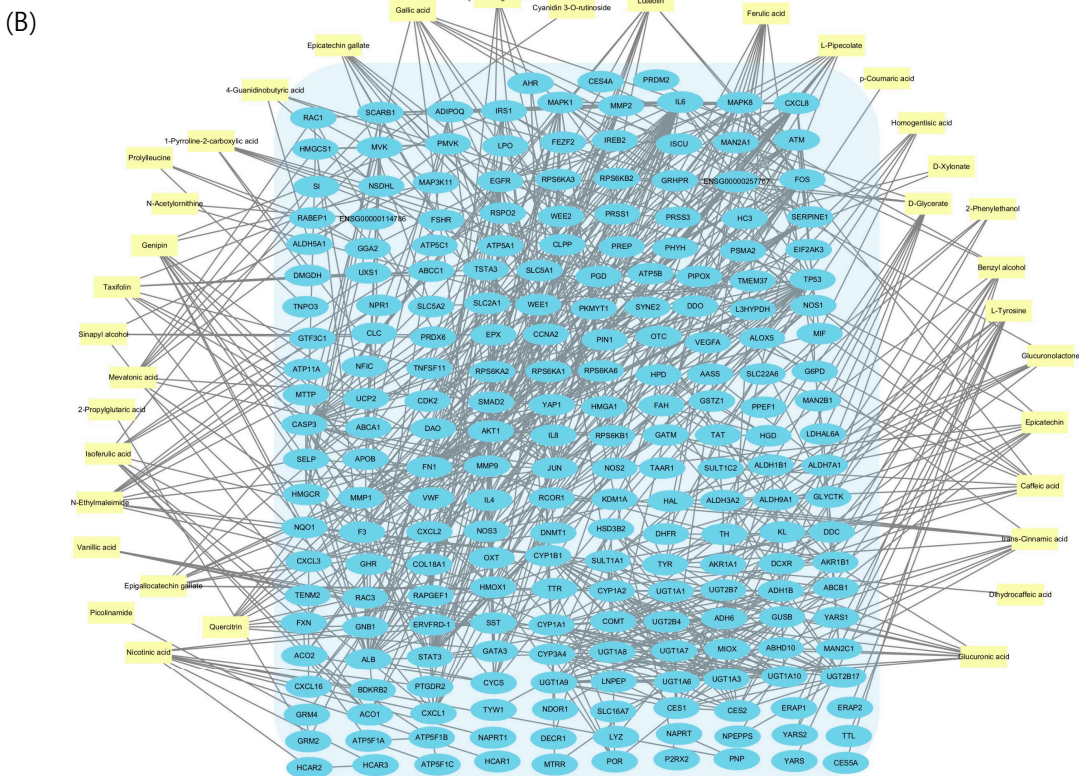

Figure S1. (A) Protein-protein interaction (PPI) network and (B) Compound-target network.
